# Supplementary material
Source: publisher figshare collection journal article supplement (https://acs.figshare.com/ndownloader/files/11878568)
Supplement: Supplementary file 1 [file 11878568]

# **Supporting Information**

## **Regenerable Nickel-functionalized Activated Carbon Cathodes Enhanced by Metal Adsorption to Improve Hydrogen Production in Microbial Electrolysis Cells**

Kyoung-Yeol Kim, Wulin Yang, and Bruce E. Logan\*

Department of Civil and Environmental Engineering, The Pennsylvania State University,

231Q Sackett Building, University Park, PA 16802, USA

\*Corresponding author: e-mail: [blogan@psu.edu](mailto:blogan@psu.edu); phone: +1-814-863-7908; fax: +1-814-863-7304

Number of Pages: 9

Number of Figures: 10

Number of Tables: 2

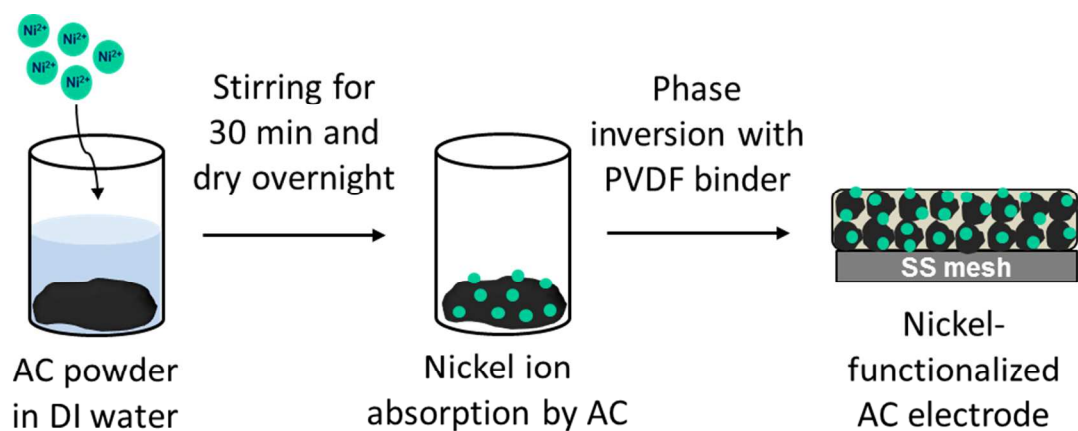

**Figure S1.** Illustration of procedures to fabricate AC-Ni electrodes.

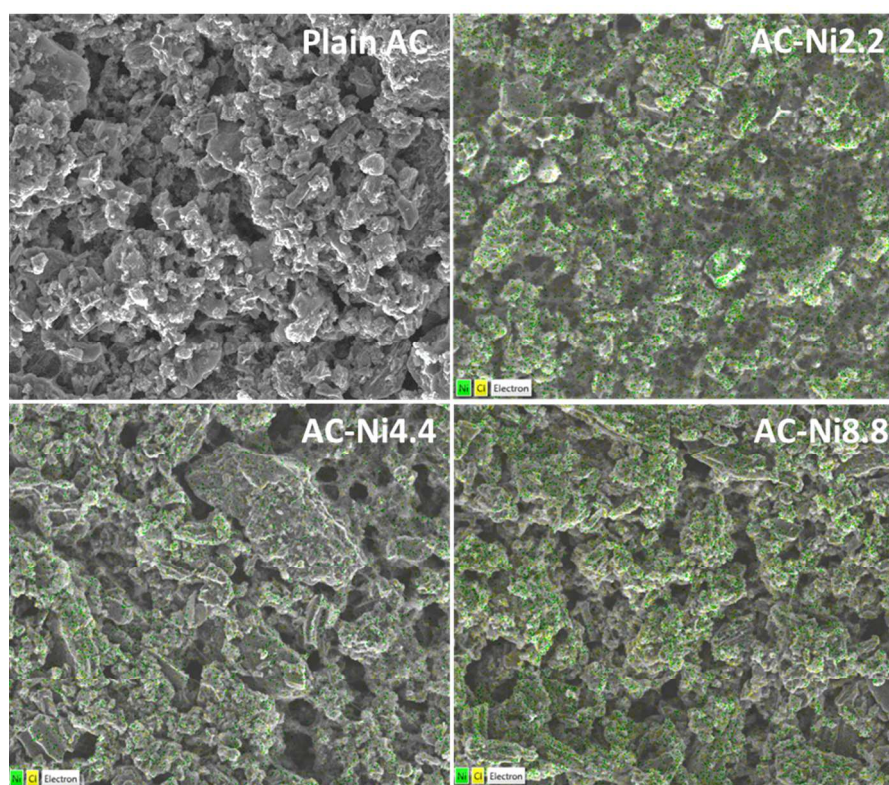

**Figure S2.** EDS images using AC-Ni2.2, AC-Ni4.4, AC-Ni8.8, and plain AC. The colors indicate nickel (green) and chloride (yellow).

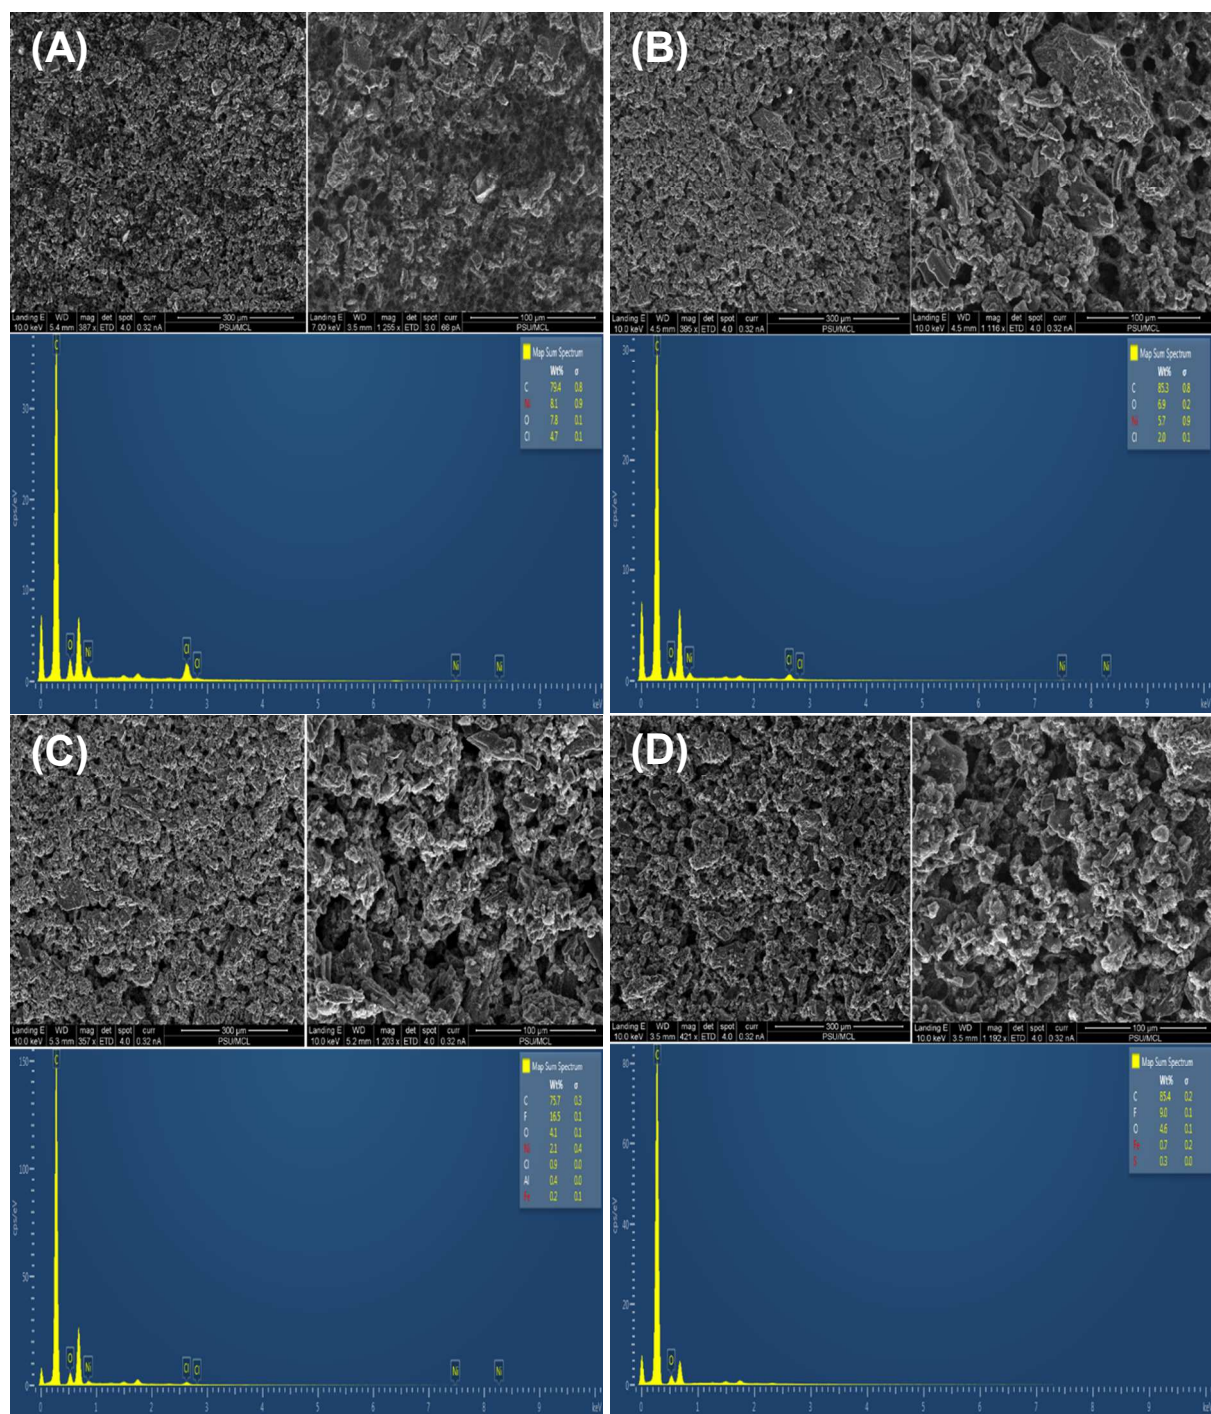

**Figure S3.** SEM images and EDS spectrums of (A) AC-Ni<sub>2.2</sub>, (B) AC-Ni<sub>4.4</sub>, (C) AC-Ni<sub>8.8</sub> and (D) plain AC electrodes.

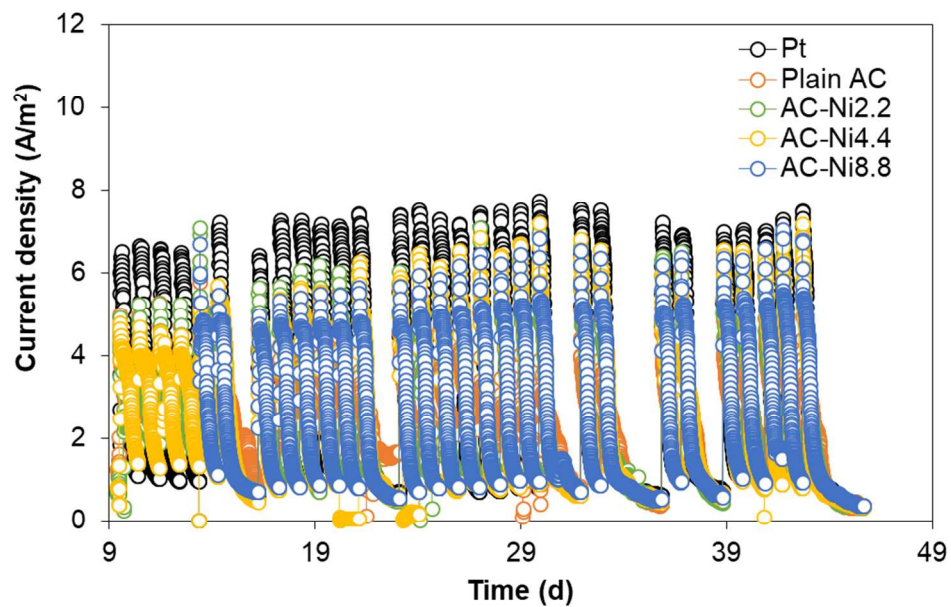

**Figure S4.** Current generations of cubic MECs with AC-Ni, plain AC and Pt cathodes over 30 days. Data was not shown for acclimation period (before day 9).



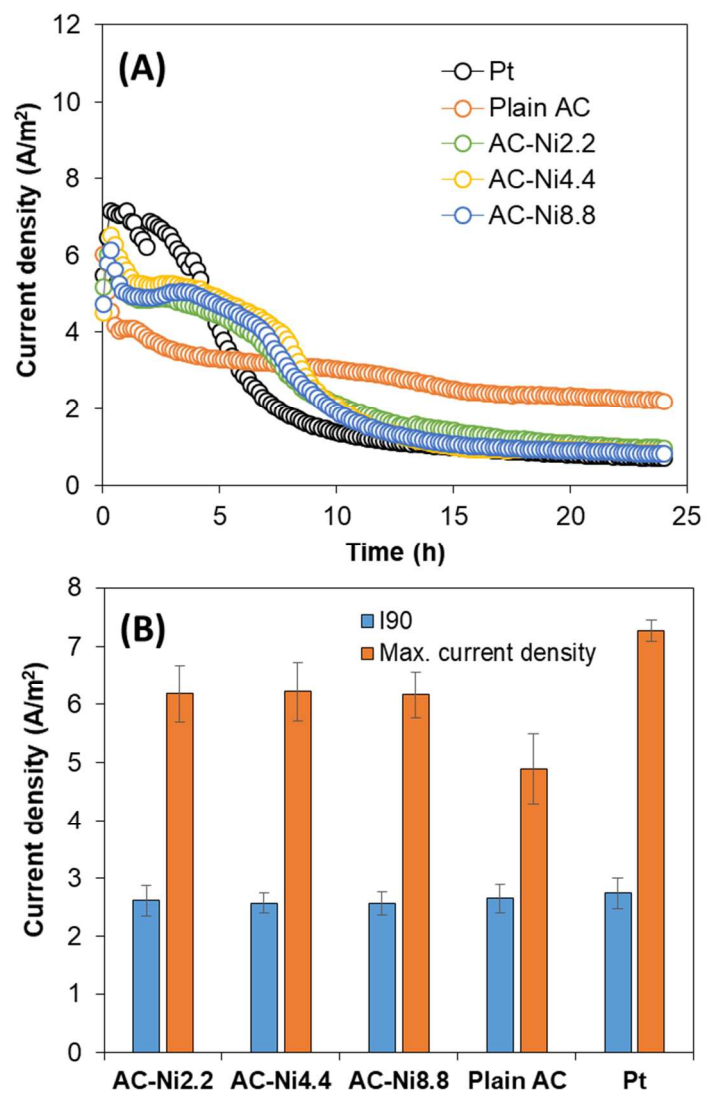

**Figure S5.** (A) Current generations of cubic MECs with AC-Ni, plain AC and Pt cathodes for a single cycle (from day 26), (B) Comparison of maximum and  $I_{90}$  current densities. Error bars indicate standard deviation ( $n \geq 15$ ).

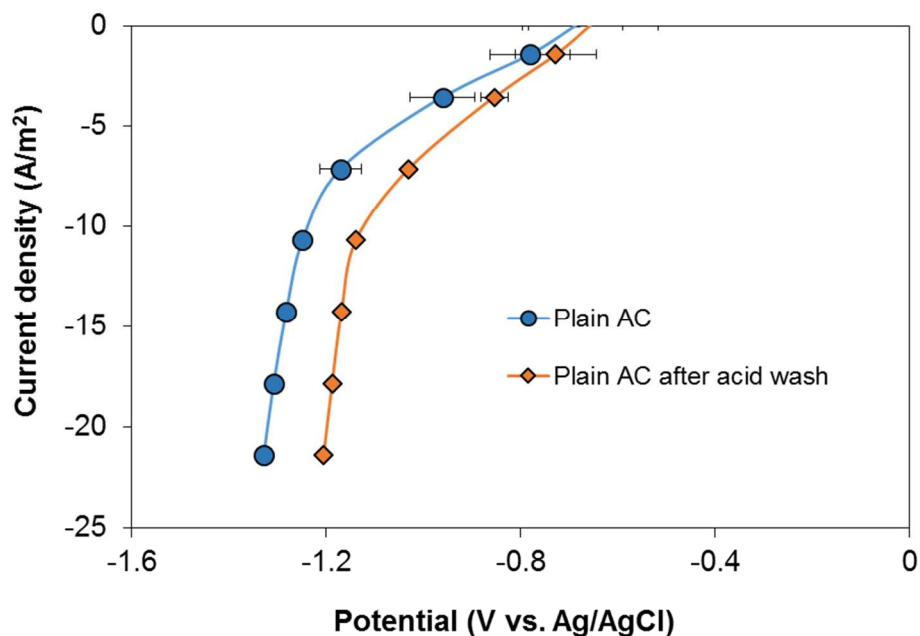

**Figure S6.** Chronopotentiometry (CP) test results for plain AC and acid-washed plain AC electrode. Error bars indicate standard deviation ( $n=3$ ).

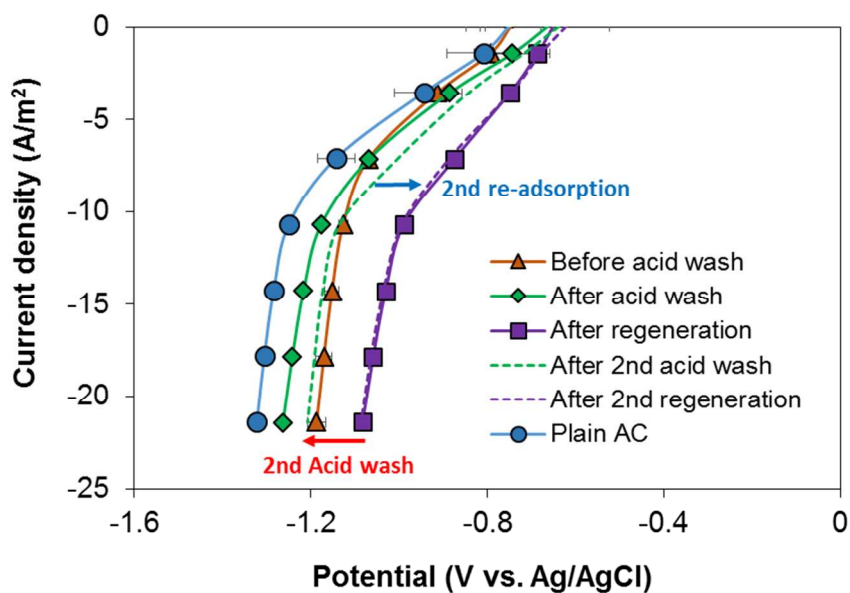

**Figure S7.** Repeated regeneration test results for AC-Ni cathodes. Dashed lines indicate results after a 2nd (repeated) acid wash and regeneration tests. Error bars indicate standard deviation ( $n \geq 2$ ).

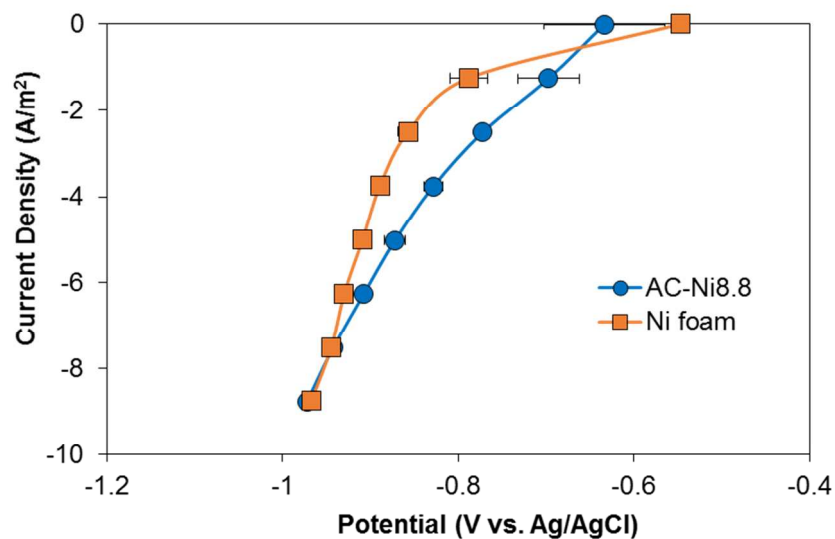

**Figure S8.** Chronopotentiometry (CP) test results for the AC-Ni8.8 and Ni foam with catholyte recirculation. Error bars indicate standard deviation (n=3).

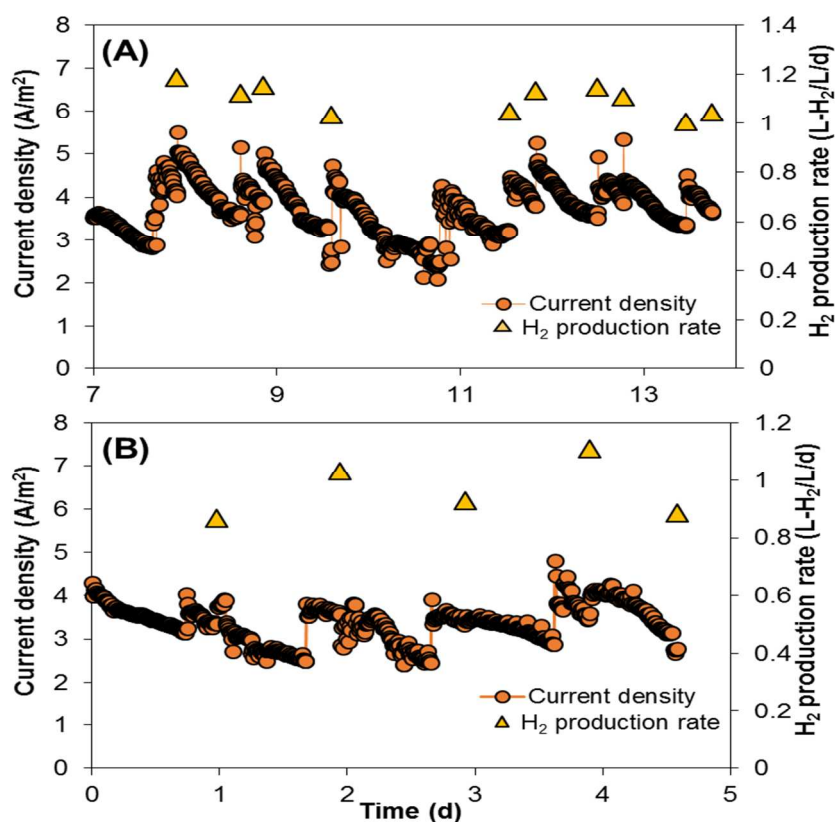

**Figure S9.** Continuous current generation and hydrogen production rates of MECs with (A) AC-Ni8.8 cathode and (B) Ni foam in a larger scale MEC (total volume: 168 mL) with catholyte recirculation.

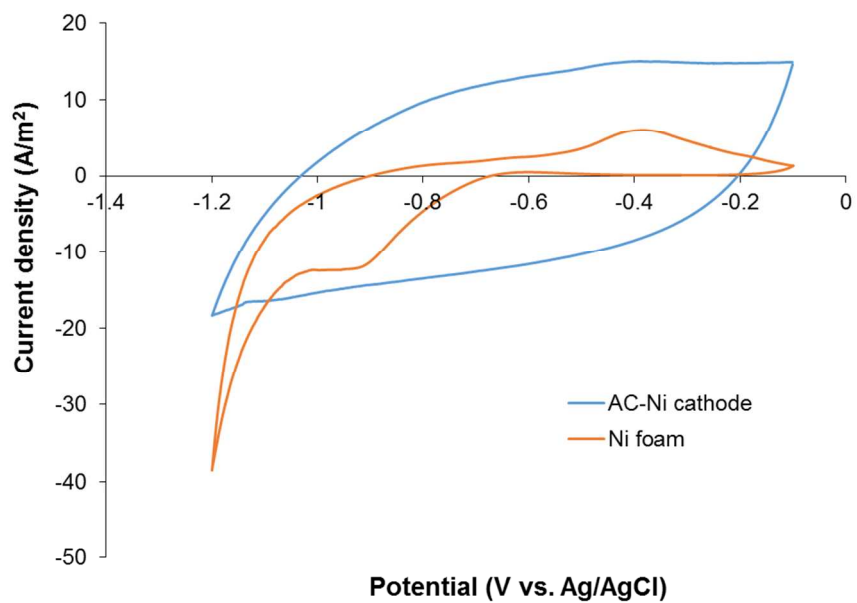

**Figure S10.** Cyclic voltammetry (CV) results for AC-Ni<sub>4.4</sub> cathode (blue) and Ni foam (orange). Voltage was swept from -1.2 V to -0.1 V (vs. Ag/AgCl) at scan rate of 1 mV/sec.



**Table S1.** Estimated price of AC-Ni and Pt/C electrodes for the MECs and commercialized price of Ni foam.

|             | Catalyst                              |                                                            |                                  | Binder                    |                                    | Current collector                |                              |                                  |
|-------------|---------------------------------------|------------------------------------------------------------|----------------------------------|---------------------------|------------------------------------|----------------------------------|------------------------------|----------------------------------|
|             | Activated carbon (\$/m <sup>2</sup> ) | NiCl <sub>2</sub> · 6H <sub>2</sub> O (\$/m <sup>2</sup> ) | Pt/C powder (\$/m <sup>2</sup> ) | PVDF (\$/m <sup>2</sup> ) | Nafion binder (\$/m <sup>2</sup> ) | Nickel foam (\$/m <sup>2</sup> ) | SS mesh (\$/m <sup>2</sup> ) | Total price (\$/m <sup>2</sup> ) |
| AC-Ni       | 0.4                                   | 4.4                                                        | n.a.                             | 1                         | n.a.                               | n.a.                             | 12                           | 18                               |
| Nickel foam | n.a.                                  | n.a.                                                       | n.a.                             | n.a.                      | n.a.                               | 20                               | n.a.                         | 20                               |
| Pt/C        | n.a.                                  | n.a.                                                       | 1630                             | n.a.                      | 210                                | n.a.                             | 12                           | 1852                             |

\*n.a: Not available

\*\*All price sources can be found at <http://www.alibaba.com>

**Table S2.** Final catholyte pHs of cubic MECs with AC-Ni, plain AC and Pt cathodes after 24 h cycle and the time periods (h) that required for 90% of the coulombs to be generated (I<sub>90</sub> time). Standard deviations indicate n≥15 for final catholyte pHs and n=5 for I<sub>90</sub> time.

|                          | AC-Ni2.2 | AC-Ni4.4 | AC-Ni8.8 | Plain AC | Pt       |
|--------------------------|----------|----------|----------|----------|----------|
| Final catholyte pH       | 9.8±0.3  | 10.1±0.3 | 10.5±0.2 | 8.4±0.1  | 10.2±0.3 |
| I <sub>90</sub> time (h) | 18.2±0.3 | 16.8±0.6 | 17.3±0.5 | 20.2±0.7 | 16.7±0.5 |
